# Supplementary material for: Blockade of IGF2R improves muscle regeneration and ameliorates Duchenne muscular dystrophy
Source: PubMed Central journal article supplement (PMC6949491; doi:10.15252/emmm.201911019), 2019-12-02

3C

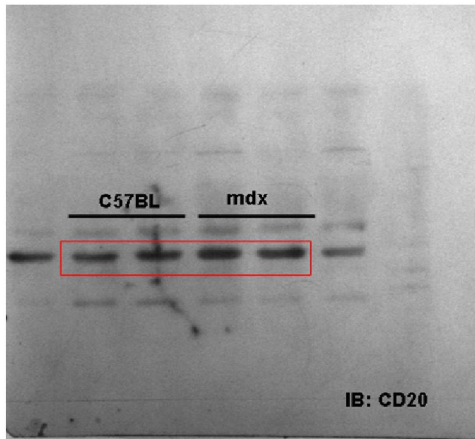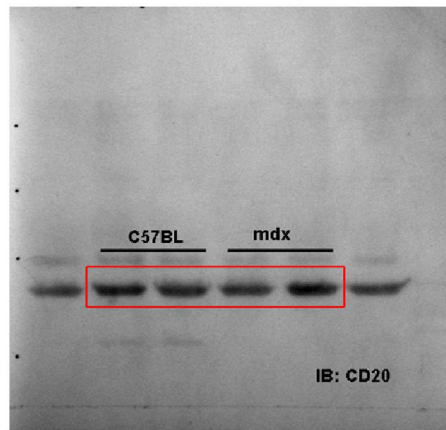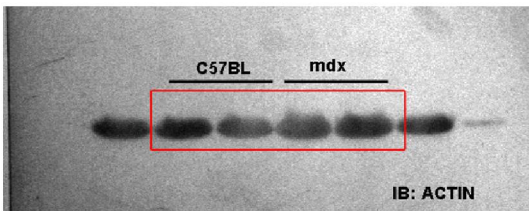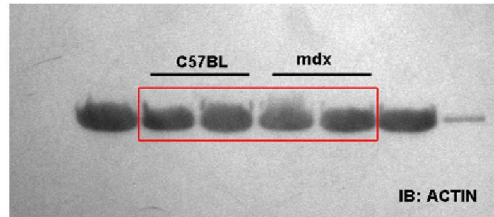

3D

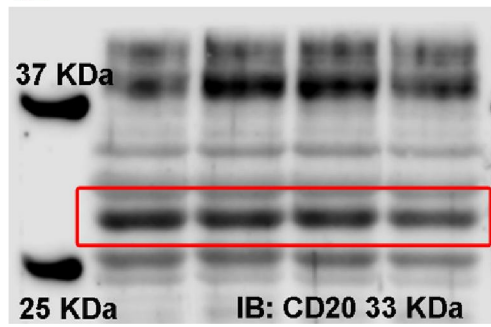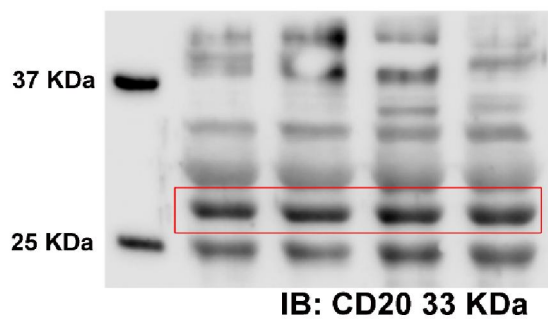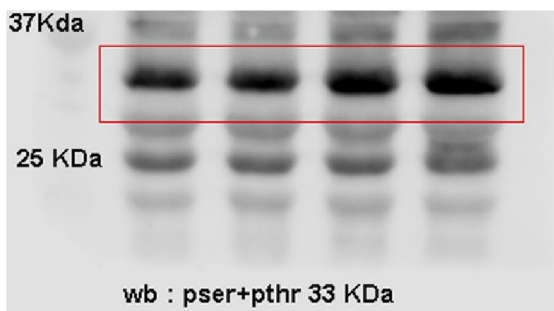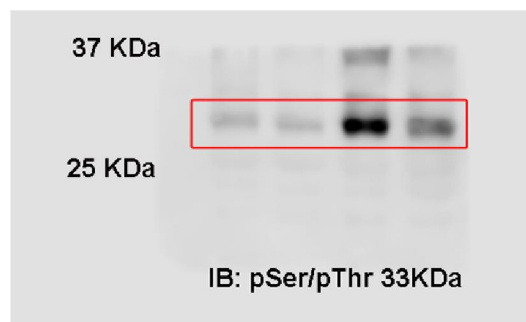

### 3D

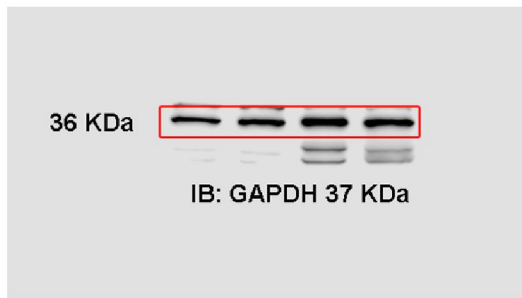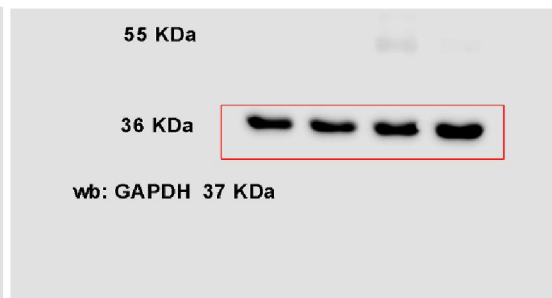

### 3E

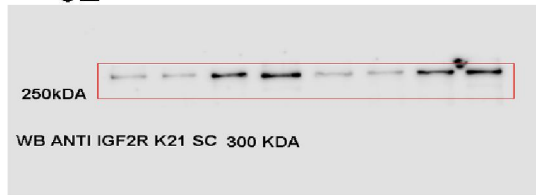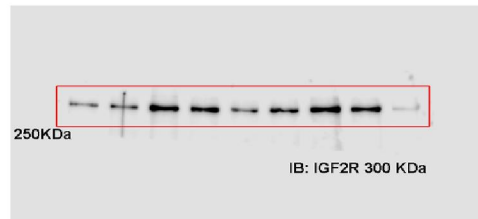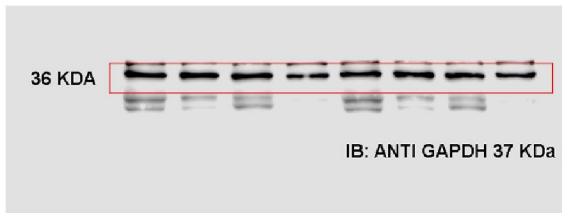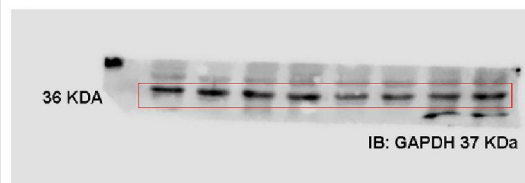

### 3F

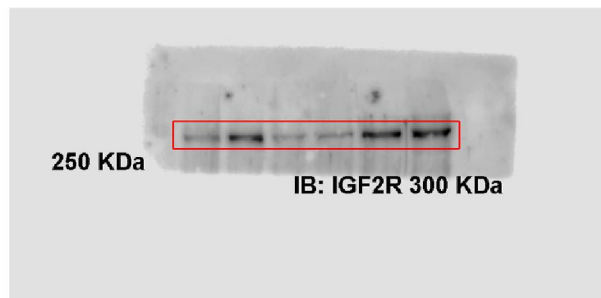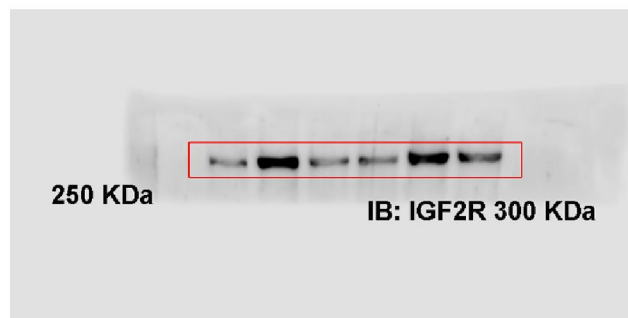

Supplement: EMMM-12-e11019-s005.pdf [file EMMM-12-e11019-s005.pdf]
