# Supplementary material for: Blockade of IGF2R improves muscle regeneration and ameliorates Duchenne muscular dystrophy
Source: PubMed Central journal article supplement (PMC6949491; doi:10.15252/emmm.201911019), 2019-12-02

**5A**

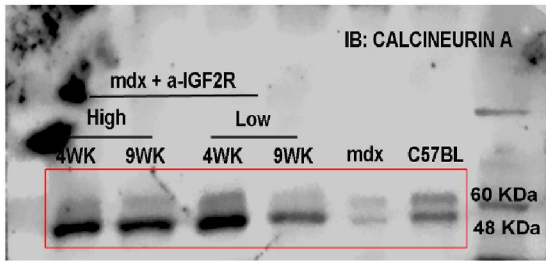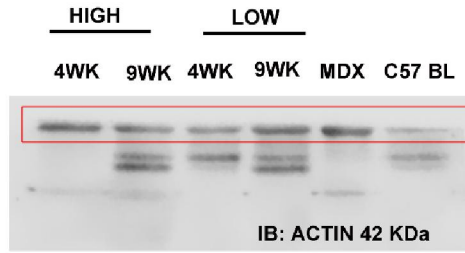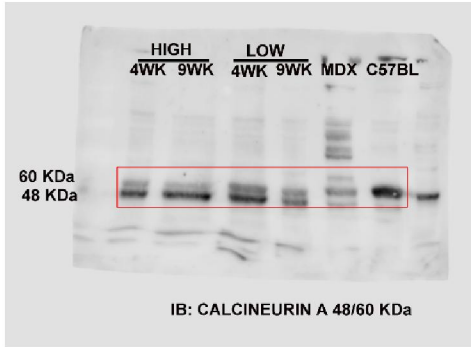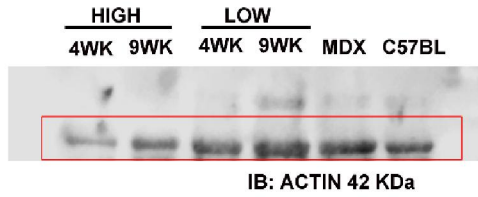

**5B**

IB: pCam Kinase II 45,70 KDa

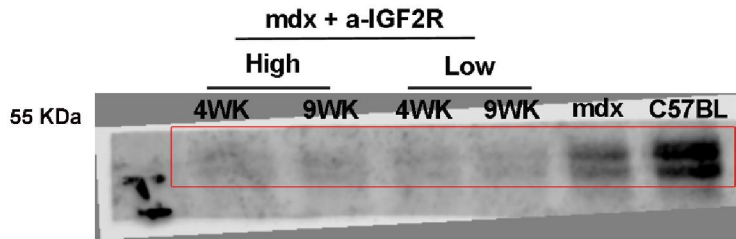

IB: pCam Kinase II 45,70 KDa

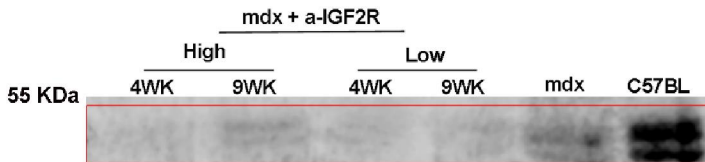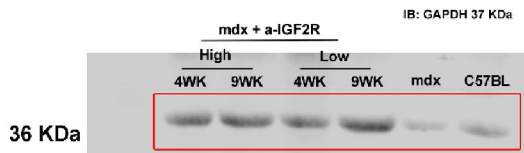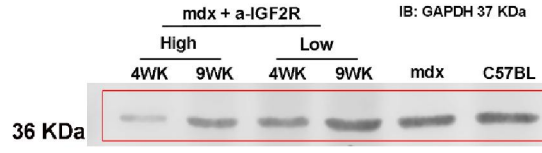

## 5B

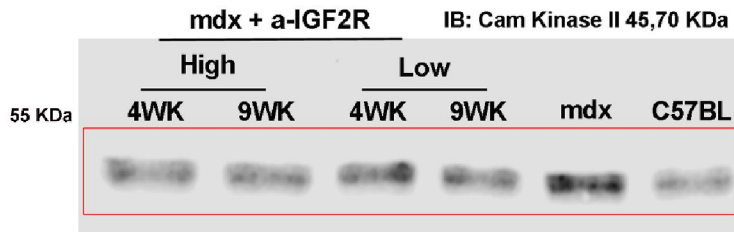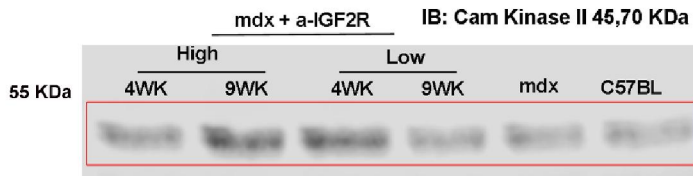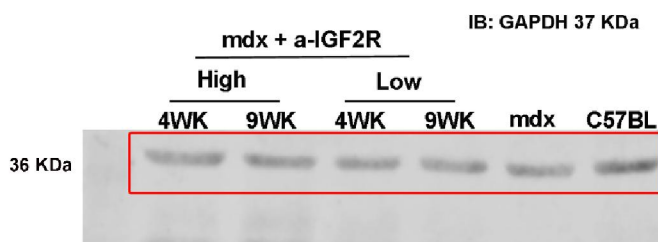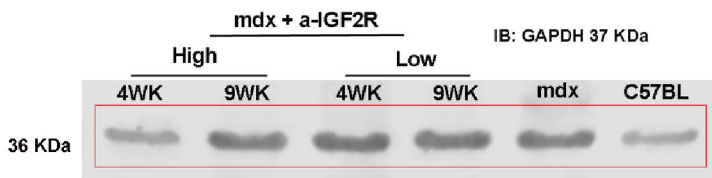

## 5C

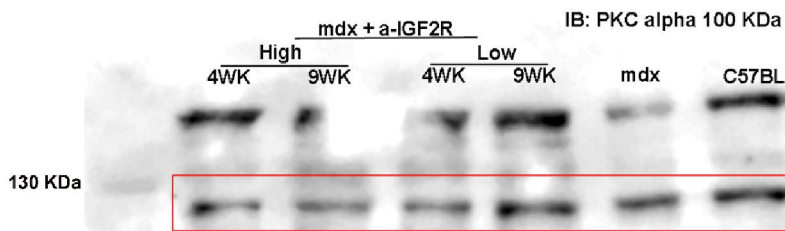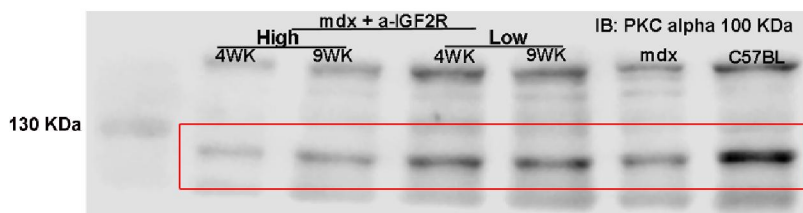

5C

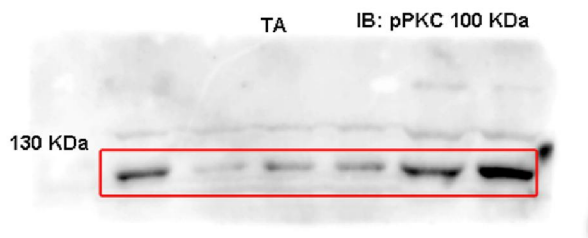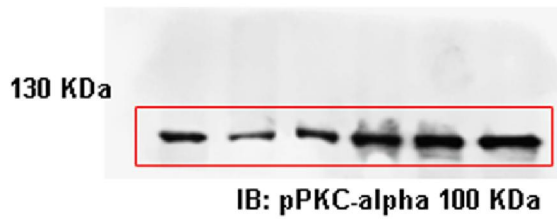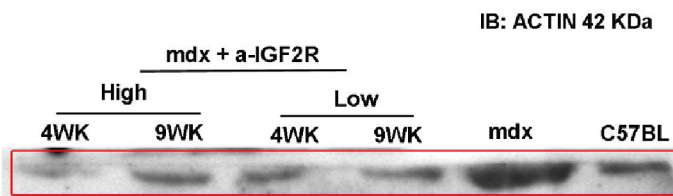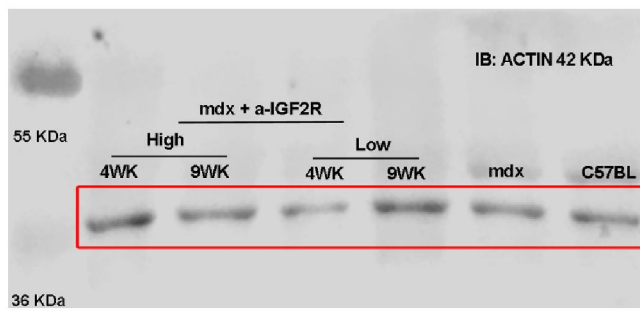

Supplement: EMMM-12-e11019-s007.pdf [file EMMM-12-e11019-s007.pdf]
