# Supplementary material for: Blockade of IGF2R improves muscle regeneration and ameliorates Duchenne muscular dystrophy
Source: PubMed Central journal article supplement (PMC6949491; doi:10.15252/emmm.201911019), 2019-12-02
Supplement: EMMM-12-e11019-s001.pdf [file EMMM-12-e11019-s001.pdf]

## **APPENDIX**

### **Table of content**

|                         |   |
|-------------------------|---|
| Table of content.....   | 1 |
| Appendix Figure S1..... | 2 |
| Appendix Figure S2..... | 3 |
| Appendix Table S1.....  | 4 |
| Appendix Table S2.....  | 5 |

**Appendix Figure S1.** (a) Size distribution of anti IGF2R aggregates was detected by DLS technique. N=3 different measurements (red, blue, and green lines) were acquired. The graph shows two major peaks in the ranges of 10-20 nm (centered at 12.8nm  $\pm$ 3.77) and 180-200nm (centered at 196.8nm  $\pm$ 56), with an intensity percentage of 71.5% and the 28.5%, respectively. PBS1X did not shows notable peaks. (b) NTA detection of anti IGF2R aggregate size distribution. N=5 measurements were acquired and averaged (red lines). Since PBS 1X, used as diluent, presents barely detectable peaks below 100nm, the graph region showing peaks between 0 and 80 nm is likely owned only to IGF2R formulation. Histogram of anti IGF2R particle concentration in the main regions between 0 and 80 nm (One-way ANOVA,  $p > 0.1$ ). (c) Analysis of reactivity against polyclonal goat anti IGF2R antibody in plasma samples collected from high and low dose injected mice treated for 4 and 9 weeks. Reactivity was expressed as fold change over the untreated (n.i.) mouse values. Not significant differences were measured between the samples (One-way ANOVA,  $p > 0.05$ ). (d) Detection of light (23 kDa) and heavy (53.6 kDa) chain goat IgG presence in TAs and VMs from high and low dose anti-IGF2R injected mice. Untreated mdx and C57Bl murine muscles were used as controls. Ponceau staining was used for WB lane quantification.

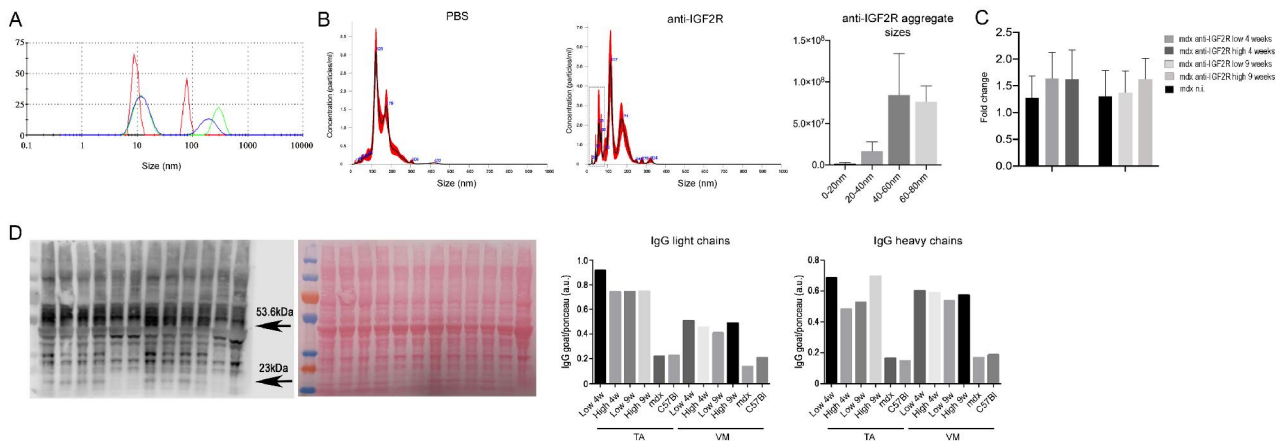

**Appendix Figure S2.** Diagram representing the lentiviral vectors with the RFP-Puromycin reporter gene expressed under a Rous sarcoma virus [Rsv] promoter

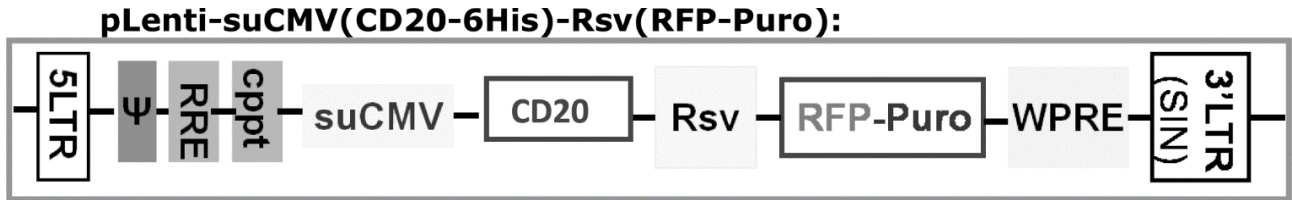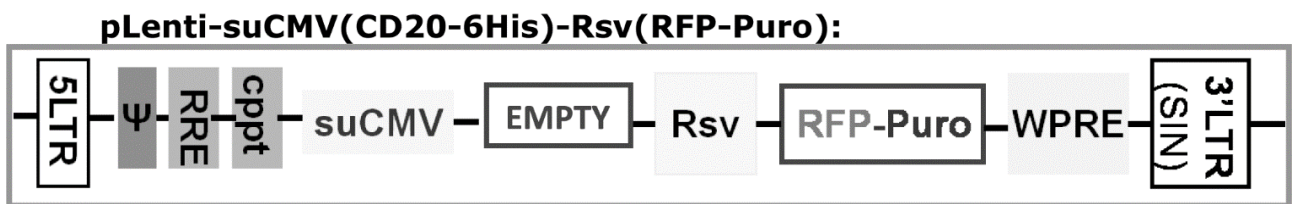

**Appendix Table S1.** Primer sequence for RT-qPCR

| <b>Gene</b>    | <b>Forward (5'-3')</b>   | <b>Reverse (5'-3')</b> |
|----------------|--------------------------|------------------------|
| $\beta$ -actin | TGGCACCACACCTTCTACAATGAG | CCGTGGTGGTGAAGCTGTAGCC |
| IGF2           | TCTCGAGGCACCCTAAATTACC   | TCAGCAAATGCCCTGAAAG    |
| IGF1           | AGAAGTGTGAGTCTCTGTTCC    | GCCAGCCTCTAAAAGATTCTG  |
| IGF1R $\beta$  | ACACACACACACACACAC       | CAGACAACCTCCAGCTTTCC   |

**Appendix Table S1. Exact p-values**

| Figure |   | Exact p value                                                                                                                                                                                                                                                                                                                                                                                                                                                                                                                                                                                                                                                                                                                                                                                                                                                                                                                                                                      | Statistical test |
|--------|---|------------------------------------------------------------------------------------------------------------------------------------------------------------------------------------------------------------------------------------------------------------------------------------------------------------------------------------------------------------------------------------------------------------------------------------------------------------------------------------------------------------------------------------------------------------------------------------------------------------------------------------------------------------------------------------------------------------------------------------------------------------------------------------------------------------------------------------------------------------------------------------------------------------------------------------------------------------------------------------|------------------|
| 1      | A | Ratio IGF2/ $\beta$ -actin:<br>C2C12+IGF1/C2C12:****<0.0001<br>C2C12 OECD20+IGF1/C2C12:****<0.0001<br>C2C12 OECD20+IGF1/C2C12+IGF1:****<0.0001                                                                                                                                                                                                                                                                                                                                                                                                                                                                                                                                                                                                                                                                                                                                                                                                                                     | One-way ANOVA    |
|        | C | CD20 immunoprecipitation using anti-pSer+pThr in C2C12 cells treated with IGF1 1nM ON/treated with IGF1 1nM 2h: *= 0.03205<br>CD20 immunoprecipitation using anti-pSer+pThr in C2C12 cells treated with IGF1 1nM ON/untreated C2C12: *= 0.03741<br>CD20 immunoprecipitation using anti-pSer+pThr in C2C12 cells treated with IGF1 10nM nM 2h/untreated C2C12: **= 0.0046                                                                                                                                                                                                                                                                                                                                                                                                                                                                                                                                                                                                           | Two-way ANOVA    |
|        | D | CD20 immunoprecipitation using anti-pSer+pThr in ShCTR-treated C2C12 cells treated with IGF1 10nM and anti-IGF2R/treated with IGF1 10 nM: ****<0.0001<br>CD20 immunoprecipitation using anti-pSer+pThr in ShCTR-treated C2C12 cells treated with IGF1 10nM and anti-IGF2R/treated with anti-FLAG: ****<0.0001<br>CD20 immunoprecipitation using anti-pSer+pThr in ShCTR-treated C2C12 cells treated with IGF1 10nM and anti-IGF2R/ShCD20-treated C2C12 cells treated with IGF1 10nM and anti-IGF2R: *= 0.0412<br><br>CD20 immunoprecipitation using anti-pSer+pThr in ShCD20-treated C2C12 cells treated with IGF1 10nM and anti-IGF2R/treated with IGF1 10 nM: ****<0.0001<br>CD20 immunoprecipitation using anti-pSer+pThr in ShCD20-treated C2C12 cells treated with IGF1 10nM and anti-IGF2R/treated with anti-FLAG: ****<0.0001                                                                                                                                               | Two-way ANOVA    |
|        | E | CD20 immunoprecipitation using anti-pSer+pThr in C2C12 treated with IGF1 1nM/untreated C2C12: ****<0.0001<br>CD20 immunoprecipitation using anti-pSer+pThr in C2C12 treated with IGF1 10nM and IGF2 100ng/ml/untreated C2C12: ****<0.0001<br>CD20 immunoprecipitation using anti-pSer+pThr in C2C12 treated with IGF1 1nM and IGF2 10ng/ml/untreated C2C12: ****<0.0001                                                                                                                                                                                                                                                                                                                                                                                                                                                                                                                                                                                                            | Two-way ANOVA    |
|        | F | IGF2R/ $\beta$ -actin<br>Untreated C2C12/C2C12 + anti-IGF2R: *= 0.0293                                                                                                                                                                                                                                                                                                                                                                                                                                                                                                                                                                                                                                                                                                                                                                                                                                                                                                             | Student t-Test   |
| 2      | G | Fusion index:<br>Untreated C2C12/ShCD20+anti-IGF2R C2C12: ***= 0.00032<br>C2C12 + anti-IGF2R/untreated C2C12: **= 0.0064<br>C2C12 + anti-IGF2R/ShCD20+anti-IGF2R C2C12: ****<0.0001<br>HsKM+anti-IGF2R/untreated C2C12: *= 0.0421<br>HsKM+anti-IGF2R/ ShCD20+anti-IGF2R C2C12: ***= 0.00098                                                                                                                                                                                                                                                                                                                                                                                                                                                                                                                                                                                                                                                                                        | Two-way ANOVA    |
| 2      | H | Myog/ $\beta$ -actin<br>C2C12 shCD20+anti-IGF2R 2 days DM/C2C12 untreated 2 days DM: ****<0.0001<br>C2C12 shCD20+anti-IGF2R 4 days DM/C2C12 untreated 4 days DM: **= 0.0100<br>C2C12 +anti-IGF2R 2 days DM/C2C12 untreated 2 days DM: **= 0.00841<br>C2C12 +anti-IGF2R 4 days DM/C2C12 untreated 4 days DM: ****<0.0001<br>C2C12 +anti-IGF2R 6 days DM/ShCD20-treated C2C12 untreated 6 days DM: *= 0.0193<br>P.M. HsKM+anti-IGF2R/P.M. C2C12 untreated: **= 0.00651<br><br>Myf5/ $\beta$ -actin<br>C2C12 shCD20+anti-IGF2R 4 days DM/C2C12 untreated 4 days DM: *= 0.0411<br>P.M. C2C12 +anti-IGF2R/C2C12 untreated: *= 0.0483<br>P.M. C2C12 +anti-IGF2R/ShCD20-treated C2C12 untreated: **= 0.0099<br>C2C12 +anti-IGF2R 2 days DM/ ShCD20-treated C2C12 untreated 2 days DM: **= 0.0074<br>C2C12 +anti-IGF2R 4 days DM/C2C12 untreated 4 days DM: ***= 0.00077<br>C2C12 +anti-IGF2R 4 days DM/ShCD20-treated C2C12 untreated 4 days DM: ***= 0.00069<br><br>MyHC/ $\beta$ -actin | Two-way ANOVA    |

|   |   |                                                                                                                                                                                                                                                                                                                                                                                                                                                                                                                                     |               |
|---|---|-------------------------------------------------------------------------------------------------------------------------------------------------------------------------------------------------------------------------------------------------------------------------------------------------------------------------------------------------------------------------------------------------------------------------------------------------------------------------------------------------------------------------------------|---------------|
|   |   | C2C12 +anti-IGF2R 2 days DM/C2C12 untreated 2 days DM: ***= 0.0004<br>C2C12 +anti-IGF2R 2 days DM/ShCD20-treated C2C12 untreated 2 days DM: ***= 0.00088<br>C2C12 +anti-IGF2R 4 days DM/C2C12 untreated 4 days DM: ****<0.0001<br>C2C12 +anti-IGF2R 4 days DM/ShCD20-treated C2C12 untreated 4 days DM: ****<0.0001<br>C2C12 +anti-IGF2R 6 days DM/C2C12 untreated 6 days DM: *= 0.0311                                                                                                                                             |               |
| 3 | D | pSer+pThr/CD20<br>TA mdx/TA C57BL6/J: ****<0.0001<br>VM mdx/VM C57BL6/J: ****<0.0001                                                                                                                                                                                                                                                                                                                                                                                                                                                | One-way ANOVA |
|   | E | IGF2R/GAPDH<br>TA mdx/TA C57BL6/J: ****<0.0001<br>TA DMD patients/TA healthy volunteers: ****<0.0001<br>VM mdx/VM C57BL6/J: ****<0.0001<br>VM DMD patients/VM healthy volunteers: ***=0.0001                                                                                                                                                                                                                                                                                                                                        | One-way ANOVA |
|   | F | IGF2R fold increase<br>TA mdx/TA C57BL6/J: *=0.0392<br>TA DMD patients/TA healthy volunteers: ****<0.0001<br>VM mdx/VM C57BL6/J: ****<0.0001<br>VM DMD patients/VM healthy volunteers: ***=0.0001                                                                                                                                                                                                                                                                                                                                   | One-way ANOVA |
| 4 | B | Regenerating fibers/total fibers<br>VM mdx anti-IGF2R High 9w/untreated mdx: ****<0.0001<br>VM mdx anti-IGF2R Low 9w/untreated mdx: ****<0.0001<br><br>mCad+ cells/section<br>TA mdx+anti-IGF2R High 9w/untreated mdx: ****<0.0001<br>TA mdx+anti-IGF2R Low 9w/untreated mdx: ****<0.0001<br>TA mdx+anti-IGF2R High 4w/untreated mdx: ***= 0.00033<br>TA mdx+anti-IGF2R Low 4w/untreated mdx: **= 0.0096<br>VM mdx+anti-IGF2R High 9w/untreated mdx: ****<0.0001<br>VM mdx+anti-IGF2R Low 9w/untreated mdx: ****<0.0001<br><br>N=10 | One-way ANOVA |
| 4 | C | Neonatal MHC/ $\beta$ -actin<br>TA mdx High 4w/untreated mdx: ****<0.0001<br>TA mdx Low 4w/untreated mdx: ****<0.0001<br>TA mdx High 9w/untreated mdx: ****<0.0001<br>TA mdx Low 9w/untreated mdx: ****<0.0001<br><br>VM mdx High 4w/untreated mdx: ****<0.0001<br>VM mdx Low 4w/untreated mdx: ****<0.0001<br>VM mdx High 9w/untreated mdx: ****<0.0001<br>VM mdx Low 9w/untreated mdx: **=0.0073<br><br>N=10                                                                                                                      | One-way ANOVA |
| 4 | D | Po/CSA 4 weeks of anti-IGF2R treatment<br>TA C57BL6/J/mdx untreated: **= 0.0065<br>TA mdx Low dose/mdx untreated: ***= 0.00028<br>TA mdx High dose/mdx untreated: **= 0.0088<br>VM C57BL6/J/mdx untreated: *= 0.0433<br>VM mdx Low dose/mdx untreated: ***= 0.00052<br><br>Po/CSA 9 weeks of anti-IGF2R treatment<br>TA C57BL6/J/mdx untreated: **= 0.0084<br>VM C57BL6/J/mdx untreated: *= 0.0368<br>VM mdx High dose/mdx untreated: **= 0.0048<br><br>N=10                                                                        | One-way ANOVA |
| 5 | A | 48 kDa calcineurin A<br>TA mdx +anti-IGF2R High 4w/untreated mdx: *=0.0284<br>60 kDa calcineurin A                                                                                                                                                                                                                                                                                                                                                                                                                                  | Two-way ANOVA |

|   |   |                                                                                                                                                                                                                                                                                                                                                                                                                                                                                                                                                                                                                                                                                                                                                                                                                                                                                                                                                                                                                                                                                                                                                                                                                  |               |
|---|---|------------------------------------------------------------------------------------------------------------------------------------------------------------------------------------------------------------------------------------------------------------------------------------------------------------------------------------------------------------------------------------------------------------------------------------------------------------------------------------------------------------------------------------------------------------------------------------------------------------------------------------------------------------------------------------------------------------------------------------------------------------------------------------------------------------------------------------------------------------------------------------------------------------------------------------------------------------------------------------------------------------------------------------------------------------------------------------------------------------------------------------------------------------------------------------------------------------------|---------------|
|   |   | <p>TA mdx untreated/mdx +anti-IGF2R High 4w: *=0.0311</p> <p>48 kDa calcineurin A<br/> VM mdx +anti-IGF2R High 4w/untreated mdx: ****&lt;0.0001<br/> VM mdx +anti-IGF2R High 9w/untreated mdx: ****&lt;0.0001<br/> VM mdx +anti-IGF2R Low 4w/untreated mdx: ****&lt;0.0001<br/> VM mdx +anti-IGF2R Low 9w/untreated mdx: ****&lt;0.0001<br/> VM mdx untreated/C57BL6/J: ****&lt;0.0001</p> <p>60 kDa calcineurin A<br/> VM mdx untreated/mdx +anti-IGF2R High 4w: ****&lt;0.0001<br/> VM mdx untreated/mdx +anti-IGF2R High 9w: ****&lt;0.0001<br/> VM mdx untreated/mdx +anti-IGF2R Low 4w: ****&lt;0.0001<br/> VM mdx untreated/mdx +anti-IGF2R Low 9w: **= 0.0065<br/> VM C57BL6/J/mdx untreated: ****&lt;0.0001</p> <p>N=10</p>                                                                                                                                                                                                                                                                                                                                                                                                                                                                              |               |
|   | B | <p>Ratio pCAMKII/CAMKII</p> <p>TA C57Bl6/J/mdx +anti-IGF2R High 4w: *= 0.04534<br/> TA C57Bl6/J/mdx +anti-IGF2R High 9w: *= 0.03898<br/> TA C57Bl6/J/mdx +anti-IGF2R Low 4w: *= 0.04883<br/> TA C57Bl6/J/mdx +anti-IGF2R Low 9w: *= 0.01084<br/> TA mdx untreated/mdx +anti-IGF2R High 4w: **= 0.01<br/> TA mdx untreated/mdx +anti-IGF2R High 9w: *= 0.0209<br/> TA mdx untreated/mdx +anti-IGF2R Low 4w: **= 0.0095<br/> TA mdx untreated/mdx +anti-IGF2R Low 9w: **= 0.0085</p> <p>VM C57Bl6/J/mdx +anti-IGF2R High 4w: *= 0.0453<br/> VM C57Bl6/J/mdx +anti-IGF2R High 9w: *= 0.0491<br/> VM C57Bl6/J/mdx +anti-IGF2R Low 4w: *= 0.0403<br/> VM C57Bl6/J/mdx +anti-IGF2R Low 9w: *= 0.0394<br/> VM C57Bl6/J/mdx untreated *= 0.0469<br/> VM mdx untreated/mdx +anti-IGF2R Low 9w: *= 0.0108<br/> VM mdx +anti-IGF2R High 9w/ mdx +anti-IGF2R Low 9w: **= 0.0010<br/> VM mdx +anti-IGF2R High 9w/ mdx +anti-IGF2R Low 4w: *= 0.022</p> <p>N=10</p>                                                                                                                                                                                                                                                            | Two-way ANOVA |
| 6 | A | <p>CD20/vinculin</p> <p>TA mdx + anti-IGF2R Low 4w/C57BL6/J: ****= 0.0002<br/> TA mdx + anti-IGF2R High 4w/C57BL6/J: **= 0.0093<br/> TA mdx + anti-IGF2R Low 9w/C57BL6/J **= 0.0021<br/> TA mdx untreated/C57BL6/J **= 0.0011<br/> TA mdx untreated/ mdx + anti-IGF2R High 9w ****= 0.0010<br/> TA mdx untreated/ mdx + anti-IGF2R Low 9w *=0.027</p> <p>pSer+pThr/CD20</p> <p>TA mdx + anti-IGF2R Low 4w/C57BL6/J: ****&lt;0.0001<br/> TA mdx + anti-IGF2R High 4w/C57BL6/J: ****&lt;0.0001<br/> TA mdx + anti-IGF2R Low 9w/C57BL6/J *= 0.0465<br/> TA mdx + anti-IGF2R High 9w/C57BL6/J: **= 0.0054<br/> TA mdx untreated/C57BL6/J **= 0.0018</p> <p>CD20/vinculin</p> <p>VM mdx + anti-IGF2R Low 4w/C57BL6/J: **=0.0039<br/> VM mdx + anti-IGF2R High 4w/C57BL6/J: ****&lt;0.0001<br/> VM mdx + anti-IGF2R Low 9w/C57BL6/J ****&lt;0.0001<br/> VM mdx + anti-IGF2R High 9w/C57BL6/J: ****= 0.0008<br/> VM mdx untreated/C57BL6/J ****&lt;0.0001</p> <p>pSer+pThr/CD20</p> <p>VM mdx + anti-IGF2R Low 4w/C57BL6/J: ****&lt;0.0001<br/> VM mdx + anti-IGF2R High 4w/C57BL6/J: ****&lt;0.0001<br/> VM mdx + anti-IGF2R Low 9w/C57BL6/J ****=0.0002<br/> VM mdx + anti-IGF2R High 9w/C57BL6/J: ****&lt;0.0001</p> | One-way ANOVA |

|     |   |                                                                                                                                                                                                                                                                                                                                                                                                                                                                                                                                                                                                                                                                                                                                                                                                                                                                                                                                       |               |
|-----|---|---------------------------------------------------------------------------------------------------------------------------------------------------------------------------------------------------------------------------------------------------------------------------------------------------------------------------------------------------------------------------------------------------------------------------------------------------------------------------------------------------------------------------------------------------------------------------------------------------------------------------------------------------------------------------------------------------------------------------------------------------------------------------------------------------------------------------------------------------------------------------------------------------------------------------------------|---------------|
|     |   | VM C57Bl6/J/mdx untreated: ****<0.0001<br>N=10                                                                                                                                                                                                                                                                                                                                                                                                                                                                                                                                                                                                                                                                                                                                                                                                                                                                                        |               |
| 6   | B | pIGF1R/IGF1R<br>TA mdx untreated/C57BL6/J: ****<0.0001<br>TA C57Bl6/J/mdx +anti-IGF2R High 4w: ****<0.0001<br>TA C57Bl6/J/mdx +anti-IGF2R High 9w: ****<0.0001<br>TA C57Bl6/J/mdx +anti-IGF2R Low 9w: ****<0.0001<br><br>VM mdx untreated/C57BL6/J: ****<0.0001<br>VM C57Bl6/J/mdx +anti-IGF2R High 4w: ****<0.0001<br>VM C57Bl6/J/mdx +anti-IGF2R High 9w: ****<0.0001<br>VM C57Bl6/J/mdx +anti-IGF2R Low 4w: ****<0.0001<br>VM C57Bl6/J/mdx +anti-IGF2R Low 9w: ****<0.0001<br>N=10                                                                                                                                                                                                                                                                                                                                                                                                                                                 | One-way ANOVA |
| 7   | C | % CD146/image<br>TA mdx + anti-IGF2R Low 4w/mdx untreated: ****<0.0001<br>TA mdx + anti-IGF2R High 4w/mdx untreated: ****<0.0001<br>TA mdx + anti-IGF2R High 9w/mdx untreated: ****<0.0001<br><br>% NG2/image<br>TA mdx + anti-IGF2R Low 4w/mdx untreated: ****<0.0001<br>TA mdx + anti-IGF2R High 4w/mdx untreated: ***= 0.00025<br>TA mdx + anti-IGF2R High 9w/mdx untreated: ****<0.0001<br>N=10                                                                                                                                                                                                                                                                                                                                                                                                                                                                                                                                   | One-way ANOVA |
| 7   | D | CD146/ $\beta$ -actin<br>TA mdx + anti-IGF2R High 4w/mdx untreated: ****<0.0001<br>TA mdx + anti-IGF2R High 9w/mdx untreated: **= 0.0053<br>TA mdx + anti-IGF2R Low 9w/mdx untreated: ***= 0.00069<br>NG2/ $\beta$ -actin<br>TA mdx + anti-IGF2R High 4w/mdx untreated: *= 0.0415<br>TA mdx + anti-IGF2R High 9w/mdx untreated: *= 0.0236<br>TA mdx + anti-IGF2R Low 9w/mdx untreated: ***= 0.00065<br><br>CD146/ $\beta$ -actin<br>VM mdx +anti-IGF2R High 4w/untreated mdx: ****<0.0001<br>VM mdx +anti-IGF2R High 9w/untreated mdx: ****<0.0001<br>VM mdx +anti-IGF2R Low 4w/untreated mdx: ***= 0.00079<br>VM mdx +anti-IGF2R Low 9w/untreated mdx: ****<0.0001<br>NG2/ $\beta$ -actin<br>VM mdx +anti-IGF2R High 4w/untreated mdx: ****<0.0001<br>VM mdx +anti-IGF2R High 9w/untreated mdx: ****<0.0001<br>VM mdx +anti-IGF2R Low 4w/untreated mdx: ***= 0.00055<br>VM mdx +anti-IGF2R Low 9w/untreated mdx: ****<0.0001<br>N=10 | One-way ANOVA |
| EV1 | A | CD20/ $\beta$ -actin<br>Untreated/ShCD20: ****<0.0001<br>OE CD20/Untreated: ****<0.0001<br>OE CD20/ShCD20: ****<0.0001<br>N=5                                                                                                                                                                                                                                                                                                                                                                                                                                                                                                                                                                                                                                                                                                                                                                                                         | One-way ANOVA |
| EV2 | B | p-CamKII/CamKII<br>ShCD20 + anti-IGF2R C2C12 2 days DM/untreated C2C12 2 days DM: ****<0.0001<br>ShCD20 + anti-IGF2R C2C12 2 days DM/untreated C2C12 2 days DM: ***=0.0002<br>P.M. anti-IGF2R C2C12/untreated C2C12: ***= 0.00016<br>anti-IGF2R C2C12 2 days DM/ C2C12 2 days DM: ****<0.0001                                                                                                                                                                                                                                                                                                                                                                                                                                                                                                                                                                                                                                         | Two-way ANOVA |



|     |   |                                                                                                                                                                                                                                                                                                                                                                                                                                                                                                                                                               |                  |
|-----|---|---------------------------------------------------------------------------------------------------------------------------------------------------------------------------------------------------------------------------------------------------------------------------------------------------------------------------------------------------------------------------------------------------------------------------------------------------------------------------------------------------------------------------------------------------------------|------------------|
|     |   | anti-IGF2R C2C12 4 days DM/ C2C12 4 days DM: ****<0.0001<br>anti-IGF2R C2C12 6 days DM/ C2C12 6 days DM: ****<0.0001<br>P.M. anti-IGF2R C2C12 /untreated Sh-CD20 C2C12: ***= 0.0004<br>anti-IGF2R C2C12 2 days DM/ Sh-CD20 C2C12 2 days DM: ****<0.0001<br>anti-IGF2R C2C12 4 days DM/ Sh-CD20 C2C12 4 days DM: ****<0.0001<br>anti-IGF2R C2C12 6 days DM/ Sh-CD20 C2C12 6 days DM: ****<0.0001                                                                                                                                                               |                  |
| EV2 | C | CalcA/vinculin<br>ShCD20 + anti-IGF2R C2C12 2 days DM/untreated C2C12 2 days DM: **=<br>0.0034<br>ShCD20 + anti-IGF2R C2C12 4 days DM/untreated C2C12 4 days DM:<br>****<0.0001<br>ShCD20 + anti-IGF2R C2C12 6 days DM/untreated C2C12 6 days DM: **=<br>0.0058<br>anti-IGF2R C2C12 4 days DM/ C2C12 4 days DM: ****<0.0001<br>anti-IGF2R C2C12 6 days DM/ C2C12 6 days DM: *= 0.0102<br>anti-IGF2R C2C12 4 days DM/ Sh-CD20 C2C12 4 days DM: ****<0.0001<br>anti-IGF2R C2C12 6 days DM/ Sh-CD20 C2C12 6 days DM: *= 0.0299                                   | Two-way<br>ANOVA |
| EV2 | E | Cyt/Nuc<br>Untreated/S.D. + Ca <sup>2+</sup> 5mM: **= 0.0072<br>Untreated/S.D. + anti-IGF2R + Ca <sup>2+</sup> 5mM: ****<0.0001<br>S.D. + Ca <sup>2+</sup> 5mM/S.D. + anti-IGF2R + Ca <sup>2+</sup> 5mM: **= 0.0090<br><br>N=3                                                                                                                                                                                                                                                                                                                                | One-way<br>ANOVA |
| EV2 | F | Myod/vinculin<br>S.D. + anti-IGF2R + Ca <sup>2+</sup> 5mM/S.D. + Ca <sup>2+</sup> 5mM: ****= 0.00044<br>S.D. + anti-IGF2R + Ca <sup>2+</sup> 5mM/anti-IGF2R + Ca <sup>2+</sup> 5mM: ****= 0.00092<br>S.D. + anti-IGF2R + Ca <sup>2+</sup> 5mM/mdx untreated: ****= 0.0006<br>S.D. + Ca <sup>2+</sup> 5mM/anti-IGF2R + Ca <sup>2+</sup> 5mM: **= 0.0079<br><br>N=3                                                                                                                                                                                             | One-way<br>ANOVA |
| EV3 | B | Fluo4+ (%)<br>C2C12 myoblasts + anti-IGF2R/C2C12: *= 0.0433<br><br>Mean Fluo<br>C2C12 myoblasts + anti-IGF2R/C2C12: *= 0.035                                                                                                                                                                                                                                                                                                                                                                                                                                  | One-way<br>ANOVA |
|     | E | Fluo4+ (%)<br>C2C12 myoblasts-ShCD20/C2C12: *= 0.0317<br>C2C12 myoblasts-ShCD20 + anti-IGF2R/C2C12: **= 0.0087                                                                                                                                                                                                                                                                                                                                                                                                                                                | One-way<br>ANOVA |
|     | G | C2C12 anti-IGF2R/C2C12: *= 0.0410                                                                                                                                                                                                                                                                                                                                                                                                                                                                                                                             | One-way<br>ANOVA |
|     | L | ORAI-1<br>Untreated/S.D. + Ca <sup>2+</sup> 5mM: **= 0.0057<br>Untreated/S.D. + anti-IGF2R + Ca <sup>2+</sup> 5mM: ****= 0.00063<br>S.D. + Ca <sup>2+</sup> 5mM/S.D. + anti-IGF2R + Ca <sup>2+</sup> 5mM: **= 0.0074                                                                                                                                                                                                                                                                                                                                          | One-way<br>ANOVA |
| EV4 | B | Ratio pSer-pThr/CD20<br>S.D. C2C12 myoblasts/untreated C2C12 myoblasts: ****<0.0001<br>S.D. C2C12 myoblasts/S.D. C2C12 ShC20 myoblasts: ****<0.0001<br>S.D. + anti-IGF2R + C2C12 myoblasts/untreated C2C12 myoblasts: ****<0.0001<br>S.D. + anti-IGF2R + C2C12 myoblasts/S.D. + anti-IGF2R + C2C12 ShC20<br>myoblasts: ****<0.0001<br>C2C12 ShCD20 myoblasts/S.D. + anti-IGF2R + C2C12 ShC20 myoblasts:<br>****<0.0001<br>C2C12 ShCD20 myoblasts/untreated C2C12 myoblasts: ****= 0.000687<br>Untreated C2C12 myoblasts/C2C12 myoblasts+anti-IGF2R: *= 0.0323 | One-way<br>ANOVA |
