# Supplementary material for: Blockade of IGF2R improves muscle regeneration and ameliorates Duchenne muscular dystrophy
Source: PubMed Central journal article supplement (PMC6949491; doi:10.15252/emmm.201911019), 2019-12-02

1A

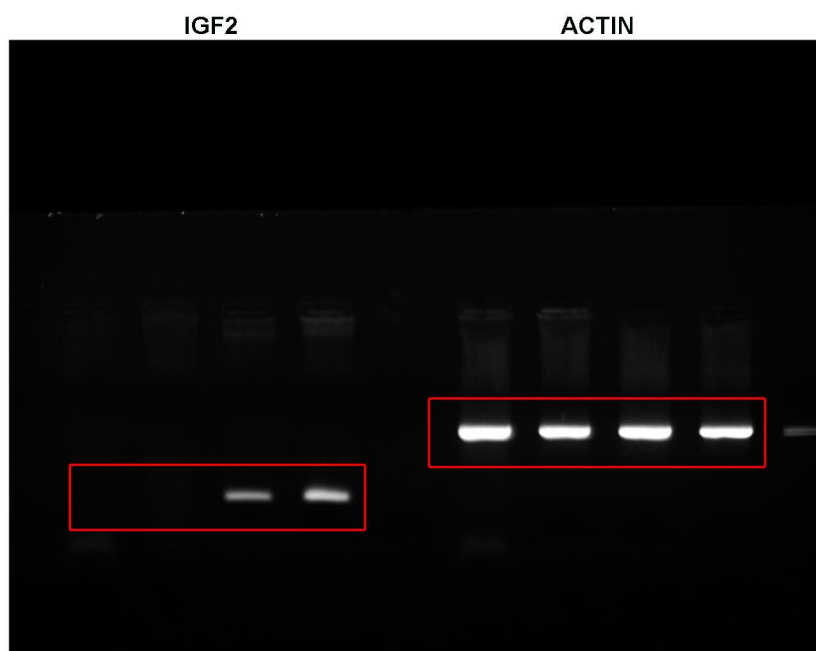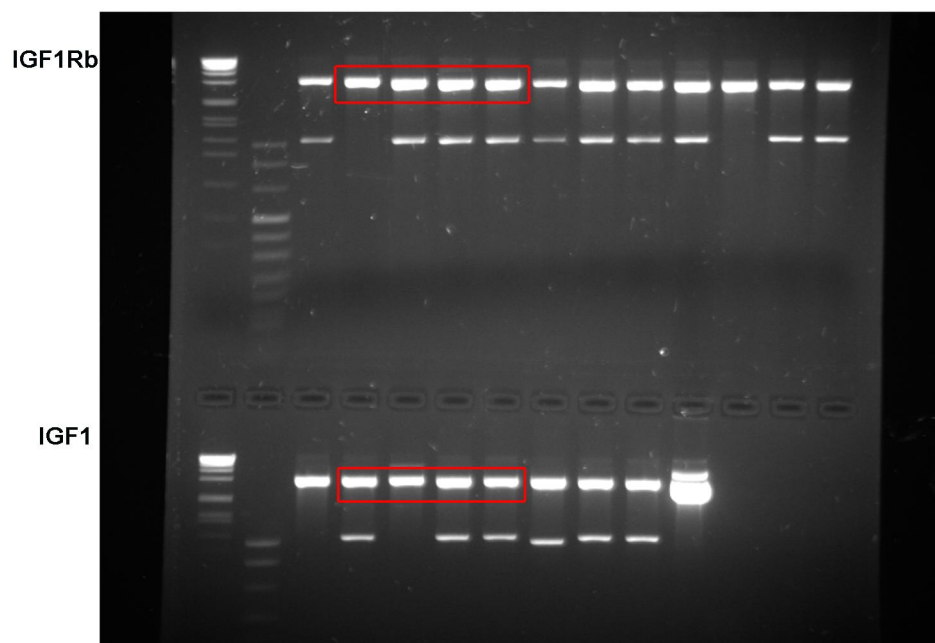

1C

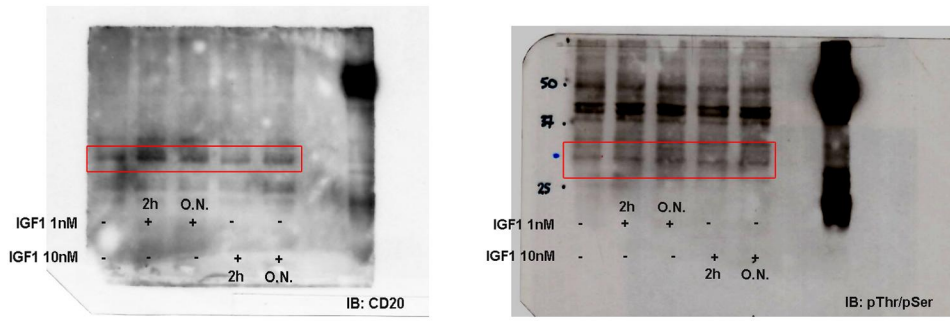

1D

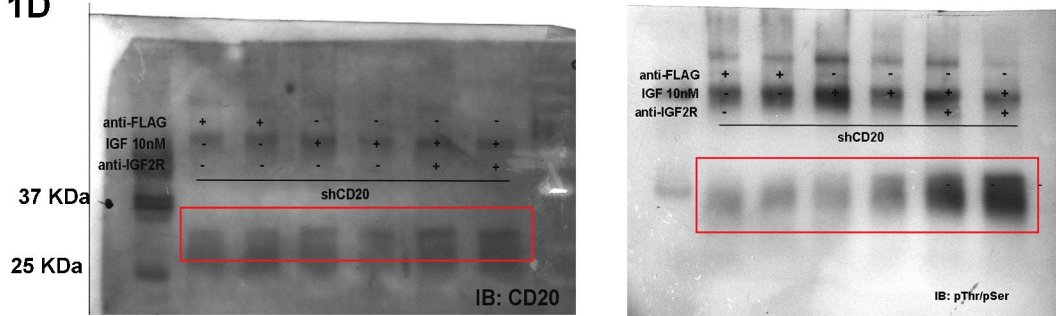

1E

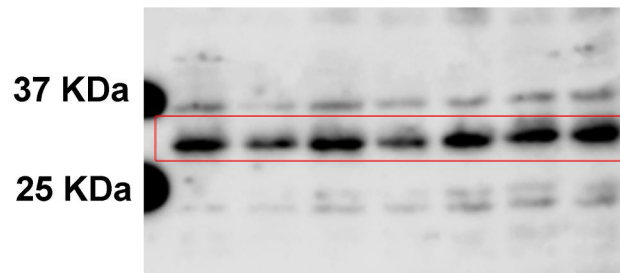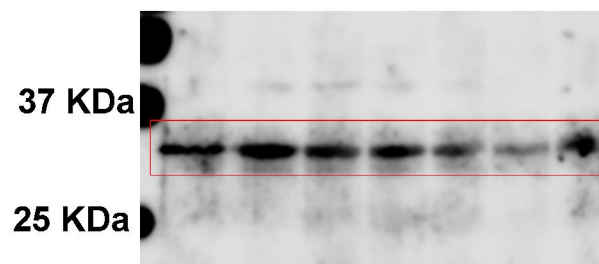

### 1 F\_G

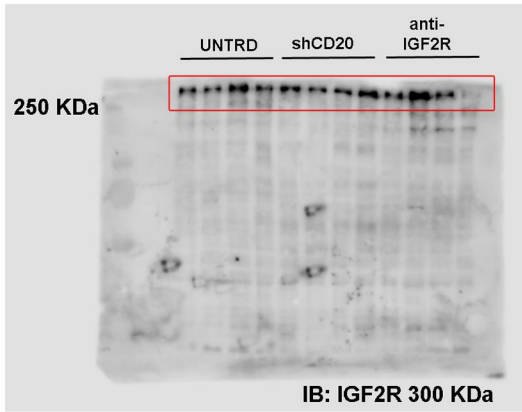

### 1 F

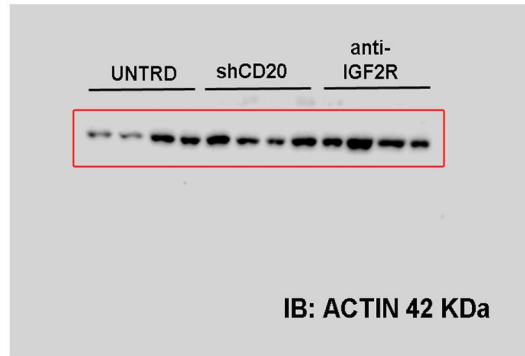

### 1G

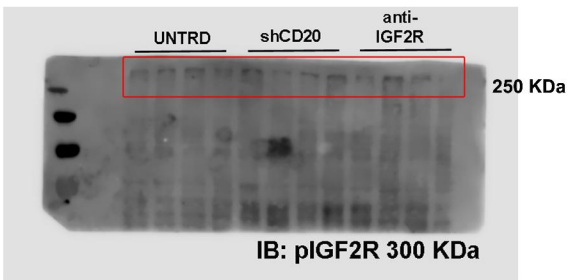

### 1H

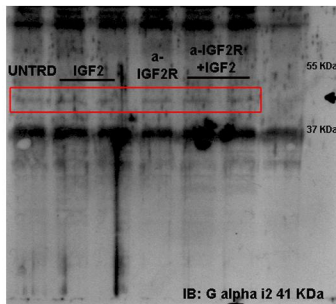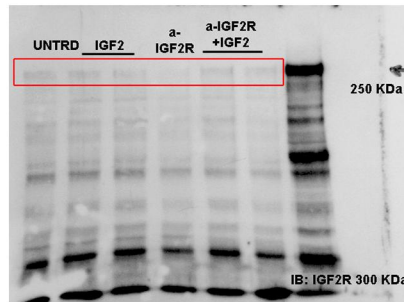

### 1I

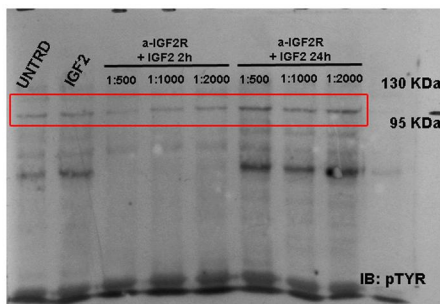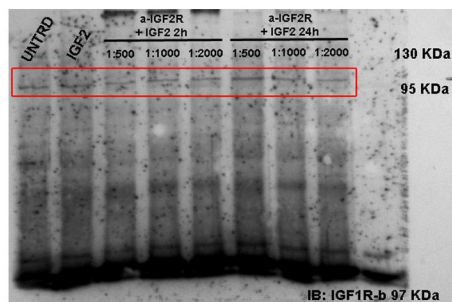

Supplement: EMMM-12-e11019-s003.pdf [file EMMM-12-e11019-s003.pdf]
