# Supplementary material for: Blockade of IGF2R improves muscle regeneration and ameliorates Duchenne muscular dystrophy
Source: PubMed Central journal article supplement (PMC6949491; doi:10.15252/emmm.201911019), 2019-12-02

4C

Untreated

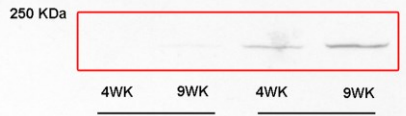

IB: NEONATAL MyHC 220 KDa

Untreated

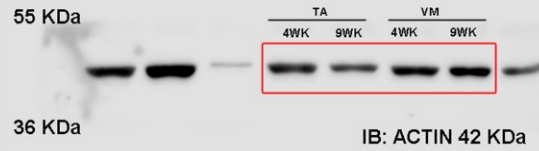

Low anti-IGF2R

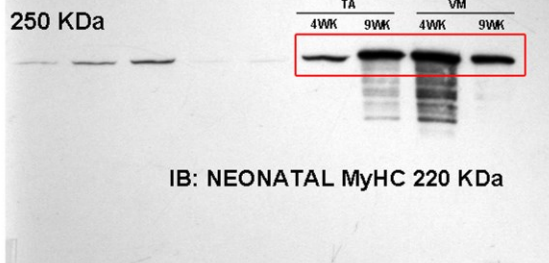

Low anti-IGF2R

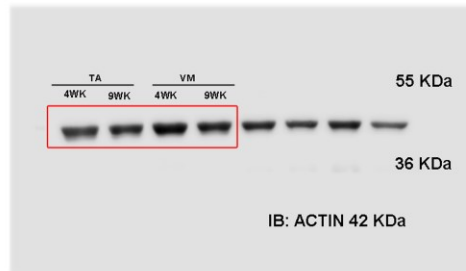

High anti-IGF2R

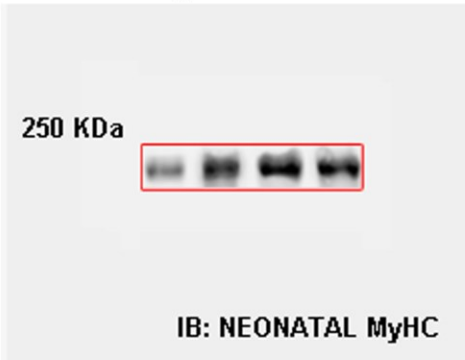

High anti-IGF2R

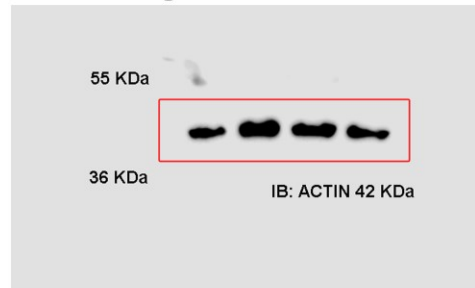

Supplement: EMMM-12-e11019-s006.pdf [file EMMM-12-e11019-s006.pdf]
