# Supplementary material for: Blockade of IGF2R improves muscle regeneration and ameliorates Duchenne muscular dystrophy
Source: PubMed Central journal article supplement (PMC6949491; doi:10.15252/emmm.201911019), 2019-12-02

## 6A

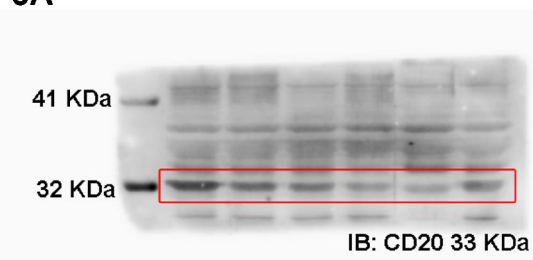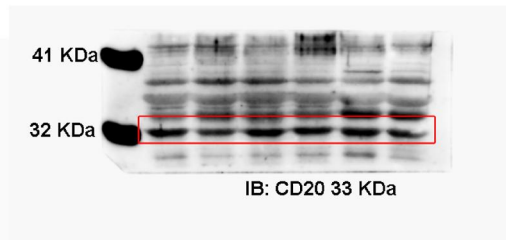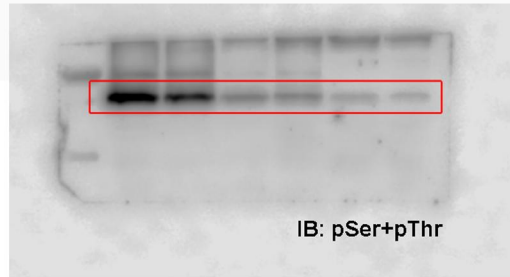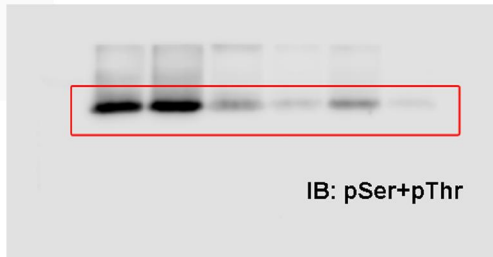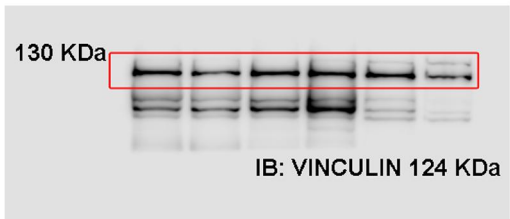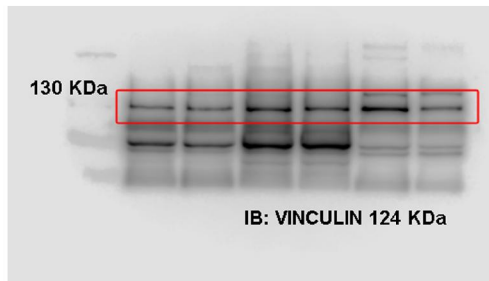

## 6B

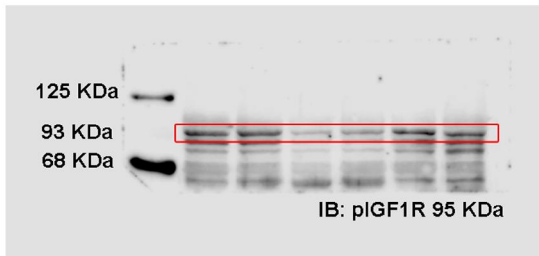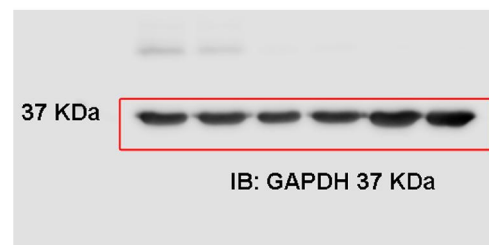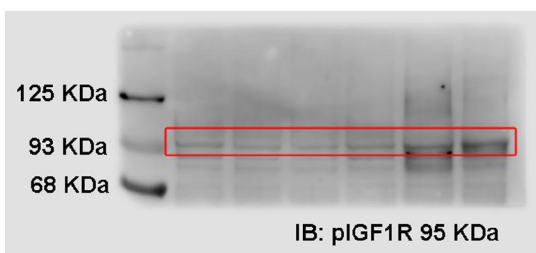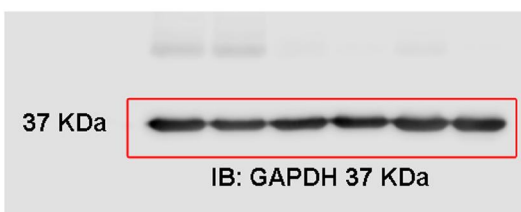

**6 B**

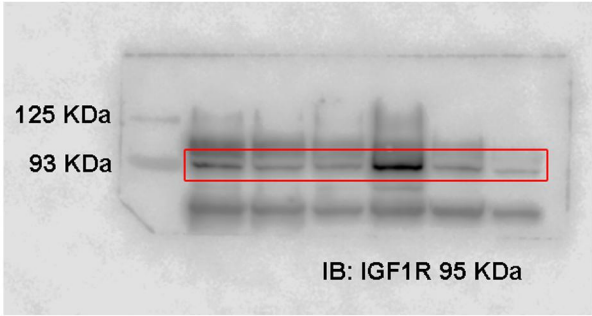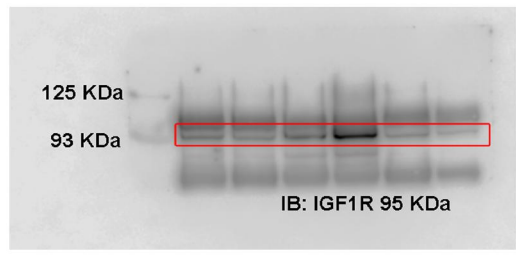

Supplement: EMMM-12-e11019-s008.pdf [file EMMM-12-e11019-s008.pdf]
